# Supplementary material
Source: Springer Nature journal article supplement (https://www.springermedizin.de/resource/supplementary/12890_2010_259_MOESM2_ESM.pdf/9504818)

**A.****Intraepithelial eosinophils**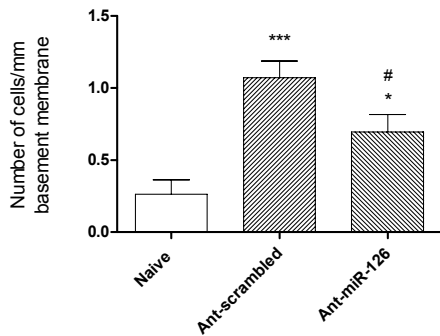**B.****Lamina propria cells**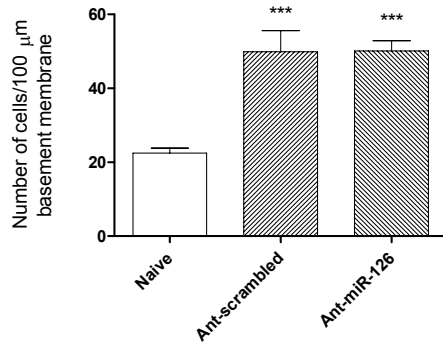**C.****Subepithelial fibrosis**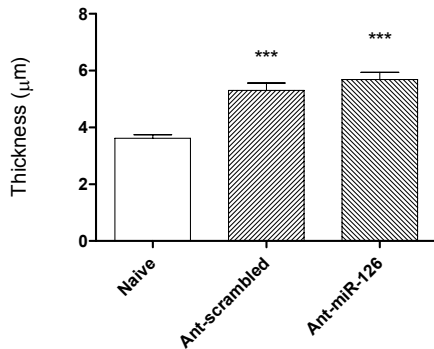**D.****Mucous cells**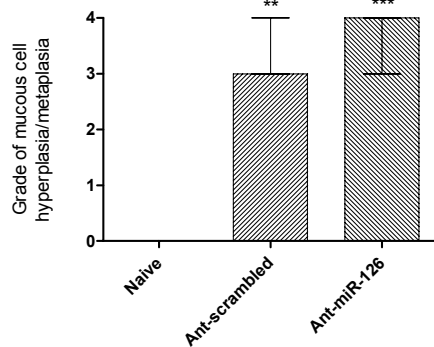

Supplement: MOESM2 [file 9504818]
